# Supplementary material
Source: HighWire-hosted journal article supplement (https://www.eneuro.org/content/10/2/ENEURO.0228-22.2022)
Supplement: inline-supplementary-material-9 [file inline-supplementary-material-9.docx]

| Group | Predictor | *df1* | *df2* | *F* | *p* | *ηp2* | *BFexclusion* |
| --- | --- | --- | --- | --- | --- | --- | --- |
| **Self-paced** | Blocks | 10.56 | 401.26 | 0.85 | .59 | .02 | <0.001 |
|  | Learning Phase | 1 | 38 | 0.88 | .35 | .02 | 11.44 |
|  | Blocks×LP | 12.82 | 487.30 | 0.69 | .77 | .02 | <0.001 |
| **15-sec** | Blocks | 9.98 | 468.87 | 0.46 | .92 | .01 | <0.001 |
|  | Learning Phase | 1 | 47 | 7.57 | <.01** | .14 | 0.05 |
|  | Blocks×LP | 13.71 | 644.47 | 0.97 | .48 | .02 | <0.001 |
| **30-sec** | Blocks | 10.82 | 486.66 | 0.77 | .67 | .02 | <0.001 |
|  | Learning Phase | 1 | 45 | 0.01 | .94 | .001 | 31.11 |
|  | Blocks×LP | 13.51 | 607.93 | 1.02 | .43 | .02 | <0.001 |

**Figure 3-4. The results of ANOVAs for offline and online changes across all blocks in the separate groups.**
